# Supplementary material for: Precision genome editing using cytosine and adenine base editors in mammalian cells
Source: Springer Nature journal article supplement (doi:10.1038/s41596-020-00450-9), 2021-01-18
Supplement: MOESM3 [file 41596_2020_450_MOESM3_ESM22.xlsx]

## Sheet: SI Table 1 - Cas variants
Cas variant	Size (aa)	BE3 optimal editing window	ABE7.10 optimal editing window	Consensus PAM	PAM scope (first 3 non-degenerate bases)	PAM scope distance from spacer	Suggested base editor usage (Fig. 5)	Notes and Refs.
SpCas9	1368	4-8	4-8	NGG	GAA, GAC, GAG, GAT, GGA, GGC, GGG, GGT, AGA, AGC, AGG, AGT	1	S, H, C, N, D, R, E, M	all reported deaminases
SpCas9-NG	1368	4-8	4-8	NG	GAA, GAC, GAG, GAT, GCA, GCC, GCG, GCT, GGA, GGC, GGG, GGT, GTA, GTC, GTG, GTT, AAG, ACG, AGG, ATG	1	S, H, C, N, D, R, M	39, 53, 74, 78, 101, 102, 103, 104, 105, 106, 109, 112, 124
SpCas9-NRRH	1368	4-8	4-8	NRRH	GAA, GAC, GAT, GCA, GCC, GCT, GGA, GGC, GGG, GGT, GTA, GTC, GTT, AAA, AAC, AAT, AGA, AGC AGT	1	S, H, C, N, D, R, M	78
SpCas9-NRTH	1368	4-8	4-8	NRTH	GAA, GAC, GAT, GCA, GCC, GCT, GGA, GGC, GGG, GGT, GTA, GTC, GTT, ATA, ATC, ATT	1	S, H, C, N, D, R, M	78
SpCas9-NRCH	1368	4-8	4-8	NRCH	GAA, GAC, GAT, GCA, GCC, GCT, GGA, GGC, GGG, GGT, GTA, GTC, GTT, ACA, ACC, ACT	1	S, H, C, N, D, R, M	78
SpCas9 VQR/VRQR	1368	4-8	4-8	NGA	GAA, GAC, GAG, GAT, GCG, GGA, GGC, GGG, GGT	1	S, H, C, N, D, R, M	39, 45, 85, 90, 94, 97, 109
SpCas9-VRER	1368	4-8	4-8	NGCG	GCG, GGA, GGC, GGG, GGT	1	S, H, C, N, D, R, M	39, 45, 97, 109
xCas9	1368	4-8	4-8	NG	GAA, GAC, GAG, GAT, GCA, GCC, GCG, GCT, GGA, GGC, GGG, GGT, GTA, GTC, GTG, GTT	1	S, H, C, N, D, R, M	39, 75, 94, 102, 109
SpG	1368	4-8	4-8	NG	GAA, GAC, GAG, GAT, GCA, GCC, GCG, GCT, GGC, GGG, GGT, GTA, GTC, GTG, GTT	1	S, H, C, N, D, R, M	77
SpRY	1368	4-8	4-8	NR, NY	AAA, AAC, AAG, AAT, ACA, ACC, ACG, ACT, AGA, AGC, AGG, AGT, ATA, ATG, ATT, CAA, CAG, CAT, CCC, CTC, CTG, GAA, GAC, GAG, GAT, GCA, GCC, GCG, GCT, GGC, GGG, GGT, GTA, GTG, GTT, TAA, TAG, TAT, TCA, TGC, TGG, TTG, TTT	1	S, H, C, N, D, R, M	77
SpCas9-CP1012	1368	4-8	4-8	NGG	GGA, GGC, GGG, GGT	1	S, H, M, E	39
SpCas9-CP1028	1368	4-8	4-8	NGG	GGA, GGC, GGG, GGT	1	S, H, M, E	39, 53, 106, 112
SpCas9-CP1041	1368	4-8	4-8	NGG	GGA, GGC, GGG, GGT	1	S, H, M, E	39, 53, 106
SpCas9-CP1249	1368	4-8	4-8	NGG	GGA, GGC, GGG, GGT	1	S, H, M, E	39
SpCas9 HF1/HF2	1368	4-8	4-8	NGG	GGA, GGC, GGG, GGT	1	D	94, 114, 115, 117, 119
eSpCas9	1368	4-8	4-8	NGG	GGA, GGC, GGG, GGT	1	D	115, 119
HypaCas9	1368	4-8	4-8	NGG	GGA, GGC, GGG, GGT	1	D	94, 115, 119
Sniper-Cas9	1368	4-8	4-8	NGG	GGA, GGC, GGG, GGT	1	D	116, 118
evoCas9	1368	-	4-8	NGG	GGA, GGC, GGG, GGT	1	D	119
ScCas9	1375	4-8	4-8	NNG	GAA, GAC, GAG, GAT, GCA, GCC, GCG, GCT, GGA, GGC, GGG, GGT, GTA, GTC, GTG, GTT	2	S, H, C, N, D, R, M	80
ScCas9+	1375	4-8	-	NNG	GAA, GAC, GAG, GAT, GCA, GCC, GCG, GCT, GGA, GGC, GGG, GGT, GTA, GTC, GTG, GTT	2	S, H, C, N, D, R, M	81
Spymac	1360	4-8	4-8	NAA	AAA, AAC, AAG, AAT	1	S, H, C, N, D, R, M	82, 100
iSpymac	1360	4-8	-	NAA	AAA, AAC, AAG, AAT	1	S, H, C, N, D, R, M	82
SaCas9	1053	3-12	3-12	NNGRRT	GAA, GAG	2	S, H, C, N, D, R, M,E	39, 44, 97, 106, 124
SaCas9-KKH	1053	3-12	3-12	NNNRRT	AAT, AGT, GAT, GGT	3	S, H, C, N, D, R, M,E	39, 45, 85, 96, 97, 106, 124
St1Cas9-LMD9	1121	3-12	3-12	NNRGAA	AGA, GGA	2	S, H, C, N, D, R, M,E	108
SauriCas9	1061	3-12	3-12	NNGG	GGA, GGC, GGG, GGT	2	S, H, C, N, D, R, M,E	107
CjCas9	984	-	-	NNNNRYAC	ACA, ACC, GCA	4	S, H, C, N, D, R, M,E	110
LbCas12a	1228	8-13	7-14	TTTV	TTT	-25	S, H, C, N, D, R, M,E	67, 98, 106, 111 (5' PAM)
LbCas12a-RVRR	1228	8-13	-	TTTV	TAT, TCC, TCT, TTT	-25	S, H, C, N, D, R, M,E	79 (5' PAM)
AsCas12a	1308	-	7-14	TTTV	TTT	-25	S, H, C, N, D, R, M,E	106 (5' PAM)
enAsCas12a	1308	8-13	7-14	TTYN, TTRN	TTC, TTT	-25	S, H, C, N, D, R, M,E	86, 106 (5' PAM)

## Sheet: SI Table 2 - Deaminases
			5' Sequence Preference				3' Sequence Preference
Deaminase	Type	Optimal editing window	A	C	G	T	A	C	G	T	Off-target DNA editing	Off-target RNA editing	Suggested base editor usage (Fig. 5)	Notes and Refs.
rAPOBEC1 (rA1)	CBE	4-8			strong anti-preference	strong preference					standard	standard	S, M	35
AID	CBE	1-10	slight preference		slight preference					slight anti-preference	standard	-	S, E, M	41, 42, 53, 94, 112, 122, 123, 133
36.1 (rA1 F113C/A123E/F205S)	CBE	4-8			strong anti-preference	strong preference					-	-	S	134
43.1 (rA1 G45D/Y75H/F113C/A123E/H166N/F205S)	CBE	4-8			strong anti-preference	strong preference					-	-	S	134
43.2-rev (rA1 F113C/A123E/A165T/F205S)	CBE	4-8			strong anti-preference	strong preference					-	-	S	134
rAPOBEC1-H47E/S48A	CBE	4-8			strong anti-preference	strong preference					-	-	S	53
Anc689	CBE	4-7			slight preference	slight preference					standard	-	S	57, 121
APOBEC3A-Y132D	CBE	4-7	-				-				-	-	S	123
APOBEC3A-D131Y	CBE	3-8	-				-				-	-	S	123
APOBEC3B (A3B)	CBE	3-8				strong preference	-				standard	-	S	112, 122, 123, 128
A3Bctd	CBE	3-8	-				-				-	-	S	128, 129, 130
pmCDA1	CBE	-1-9						slight preference			slight increase	-	S, E	47, 53, 54, 94, 112, 121, 123, 133
eAID (AID K10E, T82I, E156G, P182X)	CBE	1-9			slight preference		-				-	-	S	104
eAID-N51G	CBE	1-9	slight anti-preference		strong preference		-				-	-	S	104
LpCDA1	CBE	1-8									slight increase	-	S	61
evoAPOBEC1 (rA1 E4K/H109N/H122L/D124N/R154H/A165S/P201S/F205S)	CBE	3-8	strong anti-preference	slight preference		slight preference					slight increase	-	H, M	53, 121
evoFERNY (FERNY H102P/D104N)	CBE	3-8									slight reduction	-	H, M	121
evoCDA1 (pmCDA1 F23S/A123V/I195F)	CBE	3-12					-				strong increase	-	H, E, M	53, 121
eA3A (A3A N57G)	CBE	5-8	slight anti-preference		slight anti-preference	strong preference	slight preference		slight preference		-	-	C, D	53, 94, 133
eA3A-T44D/S45A	CBE	5-8	slight anti-preference		slight anti-preference	strong preference	slight preference		slight preference		-	-	C	53
APOBEC3A-N57A	CBE	4-8				strong preference	slight preference		slight preference		-	-	C	94
APOBEC3A QF (N57Q/Y130F)	CBE	4-8				strong preference			slight preference		-	-	C	94
A3Gctd-D316R/D317R	CBE	5-7		strong preference			-				-	-	C, N	103
YFE (rA1 W90Y/Y120F/R126E)	CBE	4-6			strong anti-preference	strong preference					-	-	N	127
A3Gctd (D316R/D317R)	CBE	5-7		slight preference			-				-	-	N	103
CDA1∆190 (pmCDA1 E190X)	CBE	3-4	-				-				-	-	N	47, 109
APOBEC3A∆182 (A3A H182X)	CBE	4-5	-				-				-	-	N	109
YE2 (rA1 W90Y/R132E)	CBE				strong anti-preference	strong preference					strong reduction	-	N	45, 94, 112
EE (rA1 R126E/R132E)	CBE				strong anti-preference	strong preference					strong reduction	-	D, N	45, 94
YEE (rA1 W90Y/R126E/R132E)	CBE	6			strong anti-preference	strong preference					strong reduction	-	D, N	45, 47, 94, 98, 112
AALN (rA1 R33A/K34A/H122L/D124N)	CBE	4-6		slight preference		strong preference	-				strong reduction	-	D, N	112
FERNY	CBE	4-6			strong anti-preference	strong preference					slight reduction	-	D, N	112, 121
APOBEC3G (A3G)	CBE	5-7				strong preference	-				strong reduction	-	D, N	103, 112, 122, 123, 128
YE1 (rA1 W90Y/R126E)	CBE	5-7			strong anti-preference	strong preference					strong reduction	slight reduction	D, N, R	45, 94, 98, 112, 125, 131
SECURE (rA1 R33A)	CBE	5-6			strong anti-preference	strong preference					strong reduction	strong reduction	D, N, R	46, 112, 122, 131
SECURE (rA1 R33A/K34A)	CBE	5-6			strong anti-preference	strong preference					strong reduction	strong reduction	D, N, R	46, 112, 122, 131
rA1 (Y120F)	CBE	4-7			strong anti-preference	strong preference					-	-	D	122, 127
SsAPOBEC3B-R54Q	CBE	2-10	slight anti-preference		strong preference		-				strong reduction	-	D	122
LjCDA1	CBE	2-6						slight anti-preference		slight anti-preference	slight reduction	-	D	61
LjCDA1L2_1	CBE	7-12									strong reduction	-	D	61
PpAPOBEC1 (PpA1)	CBE	5-9		slight anti-preference	slight anti-preference	strong preference	-				slight reduction	strong reduction	D, R	122
PpAPOBEC1-H122A	CBE	5-8				slight preference	-				strong reduction	strong reduction	D, R	122
PpAPOBEC1-R33A	CBE	6-9		slight anti-preference	slight anti-preference	strong preference	-				strong reduction	strong reduction	D, R	122
AmAPOBEC1	CBE	6-12				slight preference	-				strong reduction	slight reduction	D, R	122
RrA3F	CBE	4-10	slight anti-preference			strong preference	-				slight reduction	strong reduction	D, R	122
LpCDA1L1_3	CBE	1-13	strong preference		slight anti-preference	strong preference			slight anti-preference		slight reduction	-	D, E	61
RrA3F-F130L	CBE	2-12	slight anti-preference				-				slight reduction	strong reduction	D, E	122
SsAPOBEC3B	CBE	4-8	slight anti-preference		strong preference		-				strong reduction	strong reduction	D, E, R	122
APOBEC3A-Y130F	CBE	3-9	-				-				slight increase	strong reduction	R	123, 125, 131
APOBEC3A (A3A)	CBE	8-12				slight preference					slight increase	slight reduction	R	94, 112, 121, 122, 123, 125, 129, 130, 131, 133, 143
BEACON1 (A3A W98Y/Y132D)	CBE	8-12	-				-				-	slight reduction	R	111 (Cas12a validated only)
BEACON2 (A3A W98Y/W104A/Y130F)	CBE	3-13	-				-				-	strong reduction	R	111 (Cas12a validated only)
PmCDA1L1_4	CBE	3-13					slight preference				slight increase	-	E	61
LjCDA1L1_4	CBE	-1-13							slight anti-preference		slight increase	-	E	61
LpCDA1L1_1	CBE	1-14		slight anti-preference	slight anti-preference				slight anti-preference		slight increase	-	E	61
LjCDA1L1-1	CBE	1-15									slight increase	-	E	61
LpCDA1L1_4	CBE	1-12							slight anti-preference		standard	-	E	61
TadA7.10	ABE	4-7									standard	standard	S, M	36
TadA7.8	ABE	4-8		slight preference		slight preference	slight anti-preference				standard	-	S	36
TadA7.9	ABE	4-8		slight preference		slight preference	slight anti-preference				standard	-	S	36
TadA7.10-D53E	ABE	4-7	-				-				-	standard	S	125
TadA-8e	ABE	4-8									strong increase	strong increase	H, E, M	106
TadA-8e-V106W	ABE	4-8									-	standard	H	106
ABE8.x variants	ABE	4-7									strong increase	strong increase	H, E, M	124
ABE8.17-m-V106W	ABE	4-7									standard	standard	H	124
TadA6.3	ABE	4-9		strong preference		strong preference	strong anti-preference				standard	-	C	36
TadA7.10-F148A	ABE	4-5	-				-				-	strong reduction	N, R	125, 133
ABE-AW (TadA-E59A & TadA7.10-V106W)	ABE	4-7	-				-				slight reduction	strong reduction	D, R	126
SECURE ABE (TadA7.10-K20A/R21A)	ABE	4-7									standard	strong reduction	R	133
SECURE ABE (TadA7.10-V82G)	ABE	4-7									standard	strong reduction	R, M	133

## Sheet: SI Table 3 - Add. Deaminases
Deaminase	Type	Estimated editing window	5' Sequence Preference	3' Sequence Preference	Off-target DNA editing	Off-target RNA editing	Notes and Refs.
A3A R128A	CBE	-	-	-	-	slight reduction	125
A3A D131A	CBE	-	-	-	-	-	43
A3A D131E	CBE	-	-	-	-	-	43
APOBEC3C	CBE	-	strong TC preference	-	strong reduction	-	122, 123, 128
APOBEC3D	CBE	-	strong TC preference	-	strong reduction	-	122, 123, 128
APOBEC3F	CBE	-	strong TC preference	-	strong reduction	-	122, 123, 128
APOBEC3H-I	CBE	-	-	-	-	-	123, 128
APOBEC3H-II	CBE	-	-	-	-	-	123, 128
APOBEC3H-II (R175E/R176E)	CBE	-	-	-	-	-	123, 128
AID∆	CBE	-	-	-	-	-	42
AID*∆	CBE	-	-	-	-	-	42
AID P182X	CBE	-	no preference	no preference	-	-	41
AID R190X	CBE	-	-	-	-	-	41
AIDmono	CBE	-	slight GC, AC preference; slight CC anti-preference	no preference	-	-	43
AID-3C	CBE	-	slight TC preference	no preference	-	-	43
AID-3F	CBE	-	strong GC preference; slight CC, AC anti-preference	no preference	-	-	43
split-DddA	CBE	-	strong TC preference	no preference	-	-	Uses split-TALE system, enables mitochondrial editing, but can be used for nuclear targets, 37

## Sheet: SI Table 4 - Architectures
Architecture name	Class/Usage	Keywords/Key properties	Suggested base editor usage (Fig. 5)	Notes and Refs
BE3	CBE	-	S	35, 109
BE2	CBE	low indels, reduced efficiency, improved product purity	S	35
BE4	CBE	improved product purity, increased efficiency	S	55
BE4-Gam	CBE	low indels	S	55
BE4max	CBE	improved expression, increased efficiency	S, H, N, C, D, R, E	57
FNLS	CBE	improved expression, increased efficiency	S, H, N, C, D, R, E	58
BE-p2A-GFP	CBE	flow sorting	S, H, N, C, D, R, E	57
FNLS-p2A-Puro	CBE	selection	S, H, N, C, D, R, E	58
BE3-PAPAPAP	CBE	narrowed editing window	N	47
Target-AID/C-terminal base editor	CBE	altered editing window	S, N	54, 61
CRISPR-X	CBE	broad mutagenesis, C-to-non-T edits	M	42, 43
TAM	CBE	broad mutagenesis, C-to-non-T edits	M	41
BE-PLUS	CBE	enlarged editing window	E	40
eBE3	CBE	improved product purity, low indels	S, D	59
hyBE4max	CBE	increased efficiency	S, H, N, C, D, R, E	60
Split CBE	CBE	split architecture for AAV	S	66, 67, 70
ABE	ABE	-	S	36
ABEmax	ABE	improved expression, increased efficiency	S, H, N, C, D, R, E	57
ABE-p2A-GFP	ABE	flow sorting	S, H, N, C, D, R, E	57
miniABE/ABE8	ABE	reduced off-target RNA editing	S, H, N, C, D, R, E	106, 124, 133
Split ABE	ABE	split architecture for AAV	S	66, 69
Target-ACE/SPACE	ABE	Dual C-to-G and A-to-G editing	M	63, 64
STEME/A&C-BE	ABE	Dual C-to-G and A-to-G editing	M	62, 65
dCas base editor	Both	low indels, reduced efficiency	S	35, 36

## Sheet: SI Table 5 - Addgene BEs
Cas variant	Deaminase	Architecture	Addgene	Notes and Refs.
SpCas9	A3A	BE3	131314	132
SpCas9	A3A	BE3	109425	128
SpCas9	A3A	BE3	113410	122
SpCas9	A3A	CRISPR-X	112133 (Cas9), 112130 (deaminase, gRNA)	43
SpCas9	A3A (D131A)	CRISPR-X	112133 (Cas9), 112131 (deaminase, gRNA)	43
SpCas9	A3A (D131E)	CRISPR-X	112133 (Cas9), 112132 (deaminase, gRNA)	43
SpCas9	A3A (D131Y)	BE3	113424	122
SpCas9	A3A (Y130F)	BE3	113428	122
SpCas9	A3A (Y132D)	BE3	113425	122
SpCas9	A3A∆178	BE3	145121	109 (yeast expression)
SpCas9	A3A∆182	BE3	145120	109 (yeast expression)
SpCas9	A3A∆186	BE3	145119	109 (yeast expression)
SpCas9	A3A-Y130F	BE3	145123	109 (yeast expression)
SpCas9	AALN	BE4max	138161	111
SpCas9	ABE8 (8.13)	miniABE/ABE8	136296	123
SpCas9	ABE8 (8.13)	ABEmax	136297	123
SpCas9	ABE8 (8.17)	miniABE/ABE8	136298	123
SpCas9	ABE8 (8.17)	ABEmax	136299	123
SpCas9	ABE8 (8.20)	miniABE/ABE8	136300	123
SpCas9	ABE8 (8.20)	ABEmax	136301	123
SpCas9	ABE8 (8.8)	miniABE/ABE8	136294	123
SpCas9	ABE8 (8.8)	ABEmax	136295	123
SpCas9	ABE-AW	ABEmax	125647	125
SpCas9	AID	BE3	131316	132
SpCas9	AID	BE3	113417	122
SpCas9	AID	BE3	100803	54
SpCas9	AID	BE4max	152994	52
SpCas9	AID	CRISPR-X	85413 (gRNA), 85415 (deaminase), 85417 (Cas9)	42
SpCas9	AID (P182X)	TAM	83260	41
SpCas9	AID*∆	CRISPR-X	85413 (gRNA), 85406 (deaminase), 85417 (Cas9)	42
SpCas9	AID∆	CRISPR-X	85413 (gRNA), 85416 (deaminase), 85417 (Cas9)	42
SpCas9	AID3c	CRISPR-X	112133 (Cas9), 112128 (deaminase, gRNA)	43
SpCas9	AID3f	CRISPR-X	112133 (Cas9), 112129 (deaminase, gRNA)	43
SpCas9	AIDmono	CRISPR-X	112133 (Cas9), 112127 (deaminase, gRNA)	43
SpCas9	AmAPOBEC1	BE4	138342	121
SpCas9	Anc689	BE4max	112094	56
SpCas9	Anc689	BE-p2a-GFP	112100	56
SpCas9	APOBEC1	BE4max	112093	56
SpCas9	APOBEC3B	BE3	119135	127
SpCas9	APOBEC3B	BE3	113411	122
SpCas9	APOBEC3C	BE3	119136	127
SpCas9	APOBEC3C	BE3	113412	122
SpCas9	APOBEC3D	BE3	119137	127
SpCas9	APOBEC3D	BE3	113413	122
SpCas9	APOBEC3F	BE3	119138	127
SpCas9	APOBEC3F	BE3	113414	122
SpCas9	APOBEC3G	BE3	119139	127
SpCas9	APOBEC3G	BE3	113415	122
SpCas9	APOBEC3H	BE3	113416	122
SpCas9	APOBEC3H-I	BE3	119140	127
SpCas9	APOBEC3H-II	BE3	119141	127
SpCas9	APOBEC3H-II (R175E/R176E)	BE3	119142	127
SpCas9	CDA1∆188	BE3	145052	46 (yeast expression)
SpCas9	CDA1∆190	BE3	145050	46 (yeast expression)
SpCas9	CDA1∆192	BE3	145045	46 (yeast expression)
SpCas9	CDA1∆193	BE3	145048	46 (yeast expression)
SpCas9	CDA1∆194	BE3	145047	46 (yeast expression)
SpCas9	CDA1∆195	BE3	145044	46 (yeast expression)
SpCas9	CDA1∆198	BE3	145046	46 (yeast expression)
SpCas9	eA3A	BE3	145125	109 (yeast expression)
SpCas9	eA3A	BE3	131315	132
SpCas9	eA3A	BE4max	152997	52
SpCas9-NG	eA3A	BE4max	152999	52
SpCas9	eA3A (T44D/S45A)	BE4max	152998	52
SpCas9	EE	BE4max	138158	111
SpCas9	EE	BE3	85175	45
SpCas9	evoAPOBEC1	BE4max	122611	120
SpCas9-NG	evoAPOBEC1	BE4max	125616	120
SpCas9	evoCDA1	BE4max	122608	120
SpCas9-NG	evoCDA1	BE4max	125613	120
SpCas9	evoFERNY	BE4max	122610	120
SpCas9-NG	evoFERNY	BE4max	125615	120
SpCas9	FERNY	BE4max	122609	120
SpCas9-NG	FERNY	BE4max	125614	120
SpCas9	LjCDA1L1_4	BE3	135019	60
SpCas9	LjCDA1L2_1	Target-AID	135040	60
SpCas9	LjCDA1L2_2	Target-AID	135034	60
SpCas9	LpCDA1L1_1	BE3	135023	60
SpCas9	LpCDA1L1_1	Target-AID	135035	60
SpCas9	LpCDA1L1_4	Target-AID	135041	60
SpCas9	LpCDA1L2_2	Target-AID	135039	60
SpCas9-NG	pmCDA1	BE3	145094	109 (yeast expression)
SpCas9-NG	pmCDA1	Target-AID	145095	109 (yeast expression)
SpCas9-VQR	pmCDA1	BE3	145086	109 (yeast expression)
SpCas9-VQR	pmCDA1	Target-AID	145087	109 (yeast expression)
SpCas9-VRER	pmCDA1	BE3	145102	109 (yeast expression)
xCas9	pmCDA1	BE3	141318	109 (yeast expression)
xCas9	pmCDA1	Target-AID	145079	109 (yeast expression)
SpCas9	pmCDA1	Target-AID	131300	132
SpCas9	pmCDA1	BE4max	122607	120
SpCas9-NG	pmCDA1	BE4max	125612	120
SpCas9-NG	pmCDA1	Target-AID	119861	73
SpCas9	pmCDA1	BE3	100804	54
SpCas9	pmCDA1	Target-AID	79620	53
SpCas9	pmCDA1	BE4max	152995	52
SpCas9	pmCDA1L1_4	Target-AID	135029	60
SpCas9	PpAPOBEC1	BE4	138349	121
SpCas9	PpAPOBEC1 (H122A)	BE4	138338	121
SpCas9	PpAPOBEC1 (R33A)	BE4	138345	121
SaCas9	rA1	BE3	85169	45
SaCas9-VQR	rA1	BE3	85171	45
SaKKH	rA1	BE3	85170	45
SaCas9	rAPOBEC1	split CBE	137179 (N-term), 137180 (C-term)	66 (additional AAV vectors available)
SaKKH	rAPOBEC1	split CBE	137179 (N-term), 137181 (C-term)	66 (additional AAV vectors available)
SpCas9	rAPOBEC1	split CBE	137171 (N-term), 137172 (C-term)	66 (additional AAV vectors available)
SpCas9	rAPOBEC1	FNLS	110836	58 (additional lentiviral vectors available)
SpCas9	rAPOBEC1	BE3-PAPAPAP	145036	46 (yeast expression)
SpCas9-NG	rAPOBEC1	BE4max	125617	120
SpCas9-HF2	rAPOBEC1	BE3	120397	116
SpCas9-HF1	rAPOBEC1	BE3	87438 (for protein purification)	113
St1Cas9-LMD9	rAPOBEC1	BE4max	136652	107
SauriCas9	rAPOBEC1	BE4max	135969	106
LbCas12a	rAPOBEC1	BE3	107685	97
LbCas12a	rAPOBEC1	eBE3	107688	97
enAsCas12a	rAPOBEC1	BE3	114084	85
LbCas12a	rAPOBEC1	BE3	114086	85
LbCas12a-RVRR	rAPOBEC1	BE3	137716	78
SpCas9-NRCH	rAPOBEC1	BE4max	136920	77
SpCas9-NRRH	rAPOBEC1	BE4max	136918	77
SpCas9-NRTH	rAPOBEC1	BE4max	136919	77
SpCas9	rAPOBEC1	BE-p2a-GFP	140001	76
SpG	rAPOBEC1	BE-p2a-GFP	139998	76
SpRY	rAPOBEC1	BE-p2a-GFP	139999	76
xCas9	rAPOBEC1	BE-p2a-GFP	140000	76
xCas9	rAPOBEC1	BE3	108380	74
xCas9	rAPOBEC1	BE4	108381	74
SaKKH	rAPOBEC1	split base editor	119943, 119944	66
SpCas9	rAPOBEC1	eBE3	101093	58
SpCas9	rAPOBEC1	BE-p2a-GFP	112099	56
SaCas9	rAPOBEC1	BE4	100805	54
SaCas9	rAPOBEC1	BE4-Gam	100809	54
SpCas9	rAPOBEC1	BE4	100802	54
SpCas9	rAPOBEC1	BE4-Gam	100806	54
SpCas9	rAPOBEC1	BE4max	152991	52
SpCas9	rAPOBEC1	BE-PLUS	113025 (Cas9-GCN construct), 113029 (scFv-APOBEC construct)	40
SpCas9-CP1012	rAPOBEC1	BE4max	119801	39
SpCas9-CP1028	rAPOBEC1	BE4max	119802	39
SpCas9-CP1041	rAPOBEC1	BE4max	119803	39
SpCas9-CP1249	rAPOBEC1	BE4max	119804	39
SpCas9	rAPOBEC1	BE3	73021	35
SpCas9	rAPOBEC1	BE2	73020	35
SpCas9	rAPOBEC1, TadA7.10	Target-ACE	131124	62
SaCas9-VRER	RrA1	BE3	85173	45
SpCas9	RrA3F	BE4	138340	121
SpCas9	RrA3F (F130L)	BE4	138341	121
SpCas9	SECURE (R33A)	BE-p2a-GFP	123614	46
SpCas9	SECURE (R33A/K34A)	BE-p2a-GFP	123615	46
SpCas9	SECURE ABE (K20A/R21A)	miniABE/ABE8	131312	132
SpCas9	SECURE ABE (V82G)	miniABE/ABE8	131313	132
SpCas9	SECURE TadA(V82G), pmCDA1(R187W)	SPACE	140242	63
SpCas9-NG	SECURE TadA(V82G), pmCDA1(R187W)	SPACE	140244	63
SpCas9-VRQR	SECURE TadA(V82G), pmCDA1(R187W)	SPACE	140245	63
SpCas9	SsAPOBEC3B	BE4	138343	121
SpCas9	SsAPOBEC3B (R54Q)	BE4	138344	121
SpCas9	TadA6.3	ABE	102916	36
SpCas9	TadA7.10	ABE	113128	68 (additional split ABE AAV vectors available)
SpCas9	TadA7.10	split ABE	137173 (N-term), 137174 (C-term)	66 (additional AAV vectors available)
SpCas9	TadA7.10	miniABE/ABE8	131311	132
St1Cas9-LMD9	TadA7.10	ABEmax	136660	107
SauriCas9	TadA7.10	ABEmax	135968	106
SpCas9-NRCH	TadA7.10	ABEmax	136923	77
SpCas9-NRTH	TadA7.10	ABEmax	136922	77
SpCas9-NG	TadA7.10	ABE-p2a-GFP	140005	76
SpG	TadA7.10	ABE-p2a-GFP	140002	76
SpRY	TadA7.10	ABE-p2a-GFP	140003	76
xCas9	TadA7.10	ABE-p2a-GFP	140004	76
xCas9	TadA7.10	ABE	108382	74
SpCas9	TadA7.10	split ABE	112876 (C-term), 112734 (N-term)	68
SpCas9	TadA7.10	ABEmax	112095	56
SpCas9	TadA7.10	ABE-p2a-GFP	112101	56
SpCas9	TadA7.10	ABEmax	152989	52
SpCas9-CP1041	TadA7.10	ABEmax	152990	52
SaCas9	TadA7.10	ABEmax	119814	39
SaKKH	TadA7.10	ABEmax	119815	39
SpCas9-CP1012	TadA7.10	ABEmax	119806	39
SpCas9-CP1028	TadA7.10	ABEmax	119807	39
SpCas9-CP1041	TadA7.10	ABEmax	119808	39
SpCas9-CP1249	TadA7.10	ABEmax	119809	39
SpCas9-NG	TadA7.10	ABEmax	124163	39
SpCas9-VRER	TadA7.10	ABEmax	119812	39
SpCas9-VRQR	TadA7.10	ABEmax	119811	39
xCas9	TadA7.10	ABEmax	119813	39
SpCas9	TadA7.10	ABE	102919	36
SpCas9	TadA7.8	ABE	102917	36
SpCas9	TadA7.9	ABE	102918	36
enAsCas12a	TadA-8e	ABEmax	138507	105
LbCas12a	TadA-8e	miniABE/ABE8	138504	105
LbCas12a	TadA-8e	ABEmax	138505	105
SaCas9	TadA-8e	miniABE/ABE8	138500	105
SaCas9	TadA-8e	ABEmax	138501	105
SaKKH	TadA-8e	miniABE/ABE8	138502	105
SaKKH	TadA-8e	ABEmax	138503	105
SpCas9	TadA-8e	miniABE/ABE8	138489	105
SpCas9	TadA-8e	ABEmax	138490	105
SpCas9-CP1028	TadA-8e	miniABE/ABE8	138492	105
SpCas9-CP1028	TadA-8e	ABEmax	138498	105
SpCas9-CP1041	TadA-8e	miniABE/ABE8	138493	105
SpCas9-CP1041	TadA-8e	ABEmax	138499	105
SpCas9-NG	TadA-8e	miniABE/ABE8	138491	105
SpCas9-NG	TadA-8e	ABEmax	138497	105
enAsCas12a	TadA-8e	miniABE/ABE8	138506	105
LbCas12a	TadA-8e (V106W)	miniABE/ABE8	138508	105
SaCas9	TadA-8e (V106W)	miniABE/ABE8	138509	105
SpCas9	TadA-8e (V106W)	miniABE/ABE8	138495	105
SpCas9	YE1	BE4max	138155	111
SpCas9-CP1028	YE1	BE4max	138160	111
SpCas9-NG	YE1	BE4max	138159	111
LbCas12a	YE1	BE3	107686	97
LbCas12a	YE1	eBE3	107689	97
SpCas9	YE1	BE3	85174	45
SpCas9	YE2	BE4max	138156	111
SpCas9	YE2	BE3	85176	45
SpCas9	YEE	BE4max	138157	111
LbCas12a	YEE	BE3	107687	97
SpCas9	YEE	BE3	85177	45

## Sheet: SI Table 6 - MiSeq Library Norm
Library Name	[DNA] (ng/uL)	Total Base Pairs (nt)	Calculated [DNA] (pmol/uL)	nM concentration		Library volume (uL)	Water volume (uL)	Total volume of 4 pM library (uL)
MISEQ_LIBRARY_1	193	350	0.889401	889.401		1.79896	398.201	400
#input names of libraries to be evaluated	#average library concentration determined by NanoDrop	#average amplicon length (including the length of the Illumina barcodes)	#approximate DNA concentration based on average DNA MW of 620 g/mol	#convert to nM		#volume of concentrated library to add	#volume of water to dilute	#total final volume of 4 pM library
